# Supplementary material for: Effects of short-term moderate versus high intraocular pressure elevation on flicker-induced changes in full- field electroretinogram
Source: Research Square preprint supplement (doi:10.21203/rs.3.rs-7925173/v1), 2025-11-12
Supplement: Supplementary file 1 [file dc546f4633abc4aa66f1ac1d.xlsx]

## Sheet: Sheet1
Article title: Effects of short-term moderate versus high intraocular pressure elevation on flicker-induced changes in full-field electroretinogram; Journal name: Documenta Ophthalmologica Authors names and affiliations: Milan Rai (1,2) Xiayin Yang (1,2) Kai Yip Choi (1,2) Shaoying Tan (1,3) Henry Ho-lung Chan (1,2,3,4) 1. School of Optometry, The Hong Kong Polytechnic University, Kowloon, Hong K…
																																(Supplementary Sheet 1) Mean BP, IOP and OPP measured at Pre Loop, LOP-1, and LOP-2 conditions for both the OHT and control groups.
																																															Control Group
																																Mouse-ID	IOP-1	IOP-2		BP-1	BP-2		OPP-1	OPP-2			Mouse-ID	IOP-3	IOP-4		BP-3	BP-4
																																C-1	14	14		73.16	69.33		59.16	55.33			C-1	16	16		70.16	71
																																C-2	14	16		70.33	67		56.33	51			C-2	18	16		69	68
																																C-3	11	12		72.33	68.33		61.33	56.33			C-3	15	13		72	67.33
																																C-4	16	16		75.33	70.66		59.33	54.66			C-4	17	19		72	69.66
																																C-5	10	10		71.33	72.66		61.33	62.66			C-5	13	13		70	69
																																C-6	10	10		66	67		56	57			C-6	14	14		64.66	66
																																C-7	10	10		71.33	72.33		61.33	62.33			C-7	13	11		72.66	66.33
																																C-8	15	17		78.66	74.66		63.66	57.66			C-8	14	16		66.66	77.66
																																C-9	15	17		69.66	71.16		54.66	54.16			C-9	17	19		81.66	77.66
																																															OHT-Group
																																Mouse-ID	IOP-1	IOP-2		BP-1	BP-2		OPP-1	OPP-2			Mouse-ID	IOP-3	IOP-4		BP-3	BP-4
																																D-1	14	14		77.66	76.66		63.66	62.66			D-1	37	38		77.33	76.66
																																D-2	14	10		70.5	68.16		56.5	58.16			D-2	36	40		75	69.66
																																D-3	9	11		67.33	69.33		58.33	58.33			D-3	32	28		70.49	67
																																D-4	10	10		74.66	65.66		64.66	55.66			D-4	38	32		68.99	72
																																D-5	9	11		66.5	69.66		57.5	58.66			D-5	32	36		68.83	71.66
																																D-6	11	11		75.99	77		64.99	66			D-6	38	38		74.16	74.5
																																D-7	11	9		82.33	77.33		71.33	68.33			D-7	42	34		72	66.66
																																D-8	16	18		73.66	73		57.66	55			D-8	36	30		75	72
																																D-9	11	11		73.83	72		62.83	61			D-9	34	34		75.66	75.77
																																	1- Pre Loop Before FLS
																																	2- Pre-Loop After FLS
																																	3- LOP-1 Before FLS
																																	4- LOP-1 After FLS
																																	5- LOP-2 Before FLS
																																	6-LOP-2 After FLS
[truncated: 9 more columns]
